# Supplementary material for: Luminescence dating approaches to reconstruct the formation of plaggic anthrosols
Source: Copernicus journal article supplement (doi:10.5194/soil-10-567-2024), 2024-08-22
Supplement: Supplementary file 1 [file soil-10-567-2024-supplement.pdf]

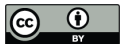

*Supplement of*

## **Luminescence dating approaches to reconstruct the formation of plaggic anthrosols**

**Jungyu Choi et al.**

*Correspondence to:* Jungyu Choi ([jungyu.choi@wur.nl](mailto:jungyu.choi@wur.nl))

The copyright of individual parts of the supplement might differ from the article licence.

Section S1: Data for dose rate calculations

Section S2: Luminescence dating protocols

Section S3: Radial plots of single-grain feldspar pIRIR measurements.

Section S4: Age model results obtained from IRSL<sub>50</sub> signals

Section S5: Radial plots of single-aliquot quartz OSL measurements

## Section S1. Data for dose rate calculations

Table S1. Data for dose rate calculations

| Sample      | Depth (cm) | Water Content (%) | Organic Content (%) | <sup>238</sup> U (Bq/kg) | <sup>232</sup> Th (Bq/kg) | <sup>40</sup> K (Bq/kg) | Beta (Gy/ka)* | Gamma (Gy/ka)* | Cosmic (Gy/ka) | Dose rate (Quartz) (Gy/ka) | Dose rate (Feldspar) (Gy/ka)** |
|-------------|------------|-------------------|---------------------|--------------------------|---------------------------|-------------------------|---------------|----------------|----------------|----------------------------|--------------------------------|
| NCL-1117134 | 22         | 12.0 ± 3.0        | 3.9 ± 1.0           | 11.9 ± 0.2               | 10.1 ± 0.6                | 211.7 ± 5.5             | 0.56 ± 0.03   | 0.32 ± 0.02    | 0.27 ± 0.01    | 1.16 ± 0.04                | 2.10 ± 0.10                    |
| NCL-1117133 | 31         | 12.9 ± 3.2        | 3.3 ± 0.8           | 9.6 ± 0.2                | 9.9 ± 0.5                 | 192.8 ± 4.8             | 0.49 ± 0.03   | 0.29 ± 0.02    | 0.26 ± 0.01    | 1.05 ± 0.03                | 1.99 ± 0.10                    |
| NCL-1117132 | 41         | 14.5 ± 3.6        | 3.8 ± 0.9           | 10.6 ± 0.2               | 10.4 ± 0.5                | 212.3 ± 5.1             | 0.53 ± 0.03   | 0.31 ± 0.02    | 0.25 ± 0.01    | 1.09 ± 0.04                | 2.03 ± 0.10                    |
| NCL-1117131 | 50         | 14.2 ± 3.5        | 3.3 ± 0.8           | 11.3 ± 0.2               | 11.2 ± 0.5                | 221.1 ± 5.2             | 0.55 ± 0.03   | 0.33 ± 0.02    | 0.24 ± 0.01    | 1.13 ± 0.04                | 2.07 ± 0.10                    |
| NCL-1117130 | 60         | 11.5 ± 2.9        | 3.3 ± 0.8           | 12.4 ± 0.2               | 11.1 ± 0.5                | 228.2 ± 5.8             | 0.58 ± 0.03   | 0.33 ± 0.02    | 0.23 ± 0.01    | 1.15 ± 0.04                | 2.09 ± 0.10                    |
| NCL-1117129 | 70         | 12.2 ± 3.1        | 3.3 ± 0.8           | 12.6 ± 0.2               | 10.8 ± 0.5                | 229.7 ± 5.4             | 0.59 ± 0.03   | 0.35 ± 0.02    | 0.23 ± 0.01    | 1.17 ± 0.04                | 2.11 ± 0.10                    |
| NCL-1117128 | 81         | 14.3 ± 3.6        | 3.8 ± 0.9           | 12.6 ± 0.2               | 11.3 ± 0.5                | 232.2 ± 5.8             | 0.58 ± 0.03   | 0.35 ± 0.02    | 0.22 ± 0.01    | 1.17 ± 0.04                | 2.11 ± 0.10                    |
| NCL-1117127 | 96         | 12.3 ± 3.1        | 2.9 ± 0.7           | 11.0 ± 0.2               | 10.7 ± 0.5                | 211.9 ± 5.0             | 0.60 ± 0.03   | 0.36 ± 0.02    | 0.22 ± 0.01    | 1.18 ± 0.03                | 2.12 ± 0.10                    |
| NCL-1117126 | 101        | 11.5 ± 2.9        | 2.9 ± 0.7           | 10.3 ± 0.2               | 9.3 ± 0.5                 | 208.5 ± 4.2             | 0.53 ± 0.03   | 0.30 ± 0.02    | 0.21 ± 0.01    | 1.06 ± 0.03                | 2.00 ± 0.10                    |
| NCL-1117125 | 112        | 7.8 ± 2.0         | 1.7 ± 0.4           | 8.1 ± 0.2                | 6.7 ± 0.4                 | 202.7 ± 4.8             | 0.52 ± 0.03   | 0.29 ± 0.01    | 0.21 ± 0.01    | 1.03 ± 0.03                | 1.97 ± 0.10                    |
| NCL-1117124 | 123        | 6.2 ± 1.6         | 1.5 ± 0.4           | 7.9 ± 0.2                | 7.3 ± 0.5                 | 212.9 ± 5.1             | 0.56 ± 0.03   | 0.31 ± 0.02    | 0.21 ± 0.01    | 1.08 ± 0.03                | 2.02 ± 0.10                    |
| NCL-1117123 | 142        | 5.8 ± 1.4         | 1.6 ± 0.4           | 7.7 ± 0.2                | 8.3 ± 0.5                 | 227.8 ± 5.3             | 0.60 ± 0.03   | 0.34 ± 0.02    | 0.20 ± 0.01    | 1.15 ± 0.03                | 2.09 ± 0.10                    |
| NCL-1117122 | 165        | 5.4 ± 1.4         | 1.2 ± 0.3           | 7.7 ± 0.2                | 8.9 ± 0.5                 | 254.7 ± 5.7             | 0.66 ± 0.03   | 0.35 ± 0.02    | 0.20 ± 0.01    | 1.21 ± 0.04                | 2.15 ± 0.10                    |

\* Water and grain size attenuated

\*\* Internal dose rate calculated as  $0.89 \pm 0.09$  Gy/ka based on the assumptions of internal concentrations of K ( $12.5 \pm 0.5$  %/ppm) and Rb ( $400 \pm 100$  %/ppm)

## Section S2. Luminescence dating protocols

**Table S2. Luminescence dating protocol used for small-aliquot quartz OSL measurements.**

| Step    | Action                                                             | Measured  |
|---------|--------------------------------------------------------------------|-----------|
| 1       | Beta dose (or Natural dose)                                        |           |
| 2       | 10s preheat to 200°C                                               |           |
| 3*      | 20s blue stimulation at 125 °C                                     | $L_n/L_i$ |
| 4       | Beta test dose                                                     |           |
| 5       | 10s preheat to 180°C                                               |           |
| 6*      | 20s blue stimulation at 125 °C                                     | $T_n/T_i$ |
| 7       | 40s blue bleach at 210°C                                           |           |
| 8       | Repeat step 1-7 for a range of doses (incl. zero and repeat dose)  |           |
| Extra 1 | Repeat step 1-7 with added infrared bleach at 30°C prior to step 3 |           |

\* The first 0-0.5 s integration interval was used for analysis, and the subsequent 0.5-1.76 integration interval was used for early background subtraction.

**Table S3. Luminescence dating protocol used for single-grain feldspar pIRIR measurements.**

| Step | Action                                                            | Measured                           |
|------|-------------------------------------------------------------------|------------------------------------|
| 1    | Beta dose (or Natural dose)                                       |                                    |
| 2    | 120s preheat to 200°C                                             |                                    |
| 3*   | 2s single-grain IR laser stimulation at 50°C                      | $L_n, L_i$ (IRSL <sub>50</sub> )   |
| 4*   | 2s single-grain IR laser stimulation at 175°C                     | $L_n, L_i$ (pIRIR <sub>175</sub> ) |
| 5    | Beta test dose                                                    |                                    |
| 6    | 120s preheat to 200°C                                             |                                    |
| 7*   | 2s single-grain IR laser stimulation at 50°C                      | $T_n, T_i$ (IRSL <sub>50</sub> )   |
| 8*   | 2s single-grain IR laser stimulation at 175°C                     | $T_n, T_i$ (pIRIR <sub>175</sub> ) |
| 9    | 300s IR stimulation at 210 °C                                     |                                    |
| 10   | Repeat step 1-9 for a range of doses (incl. zero and repeat dose) |                                    |

\* The 0.17-0.23 s integration interval was used for analysis, and the 1.29-1.62 s integration interval was used for background subtraction.

Section S3. Radial plots of single-grain feldspar pIRIR measurements

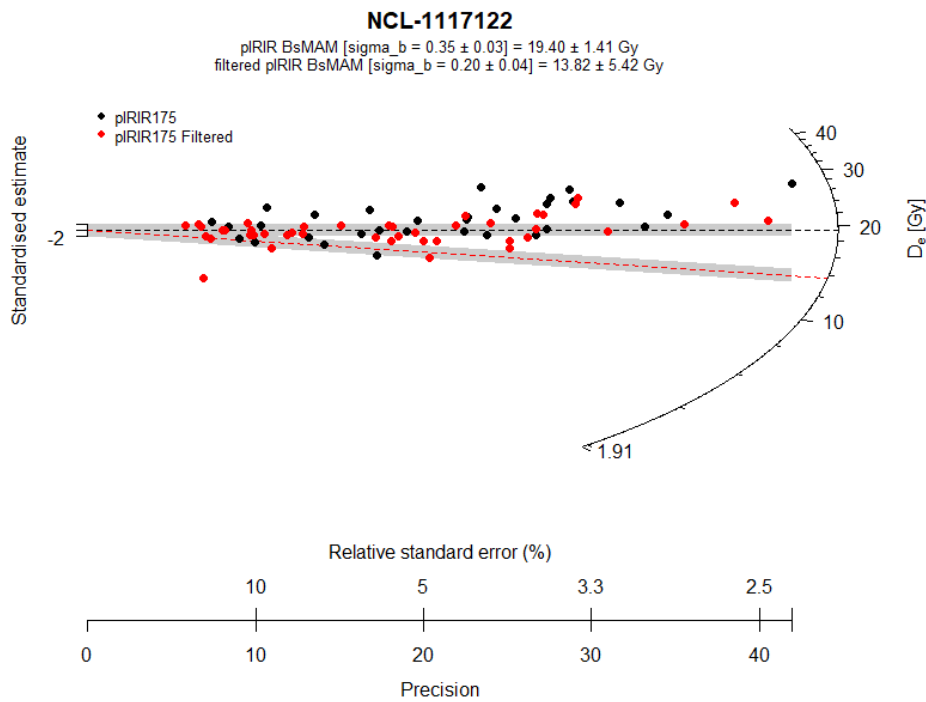

Figure S1. Radial plot of equivalent dose obtained from single-grain feldspar pIRIR measurement of NCL-1117122. The black dotted line indicates the BsMAM result of the total dataset, and the red dotted line indicates the BsMAM result of the filtered dataset. The  $\sigma_b$  values applied for each BsMAM are indicated in the figure.

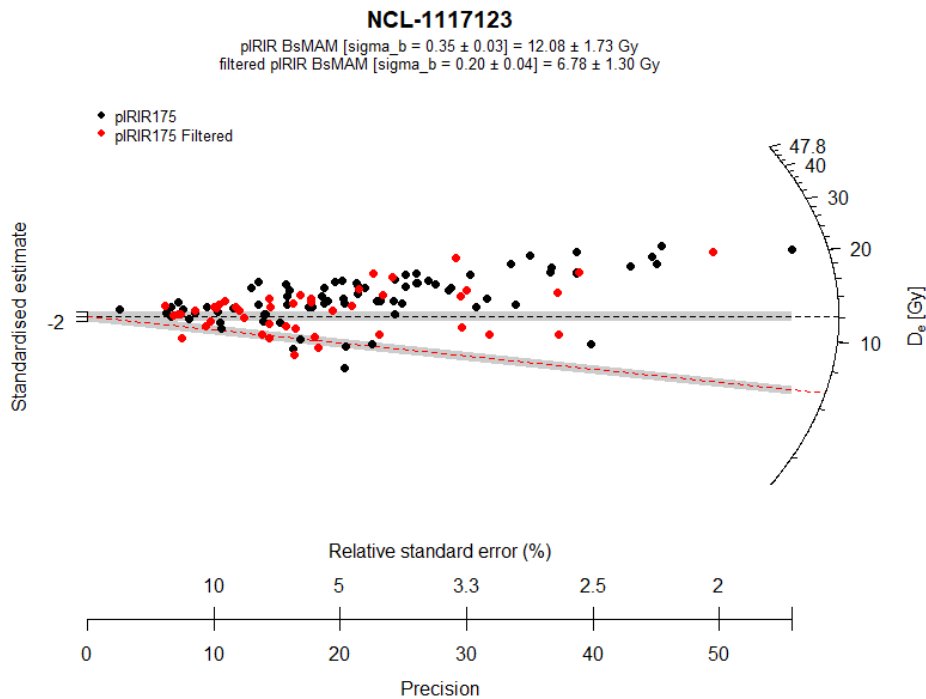

Figure S2. Radial plot of equivalent dose obtained from single-grain feldspar pIRIR measurement of NCL-1117123. The black dotted line indicates the BsMAM result of the total dataset, and the red dotted line indicates the BsMAM result of the filtered dataset. The  $\sigma_b$  values applied for each BsMAM are indicated in the figure.

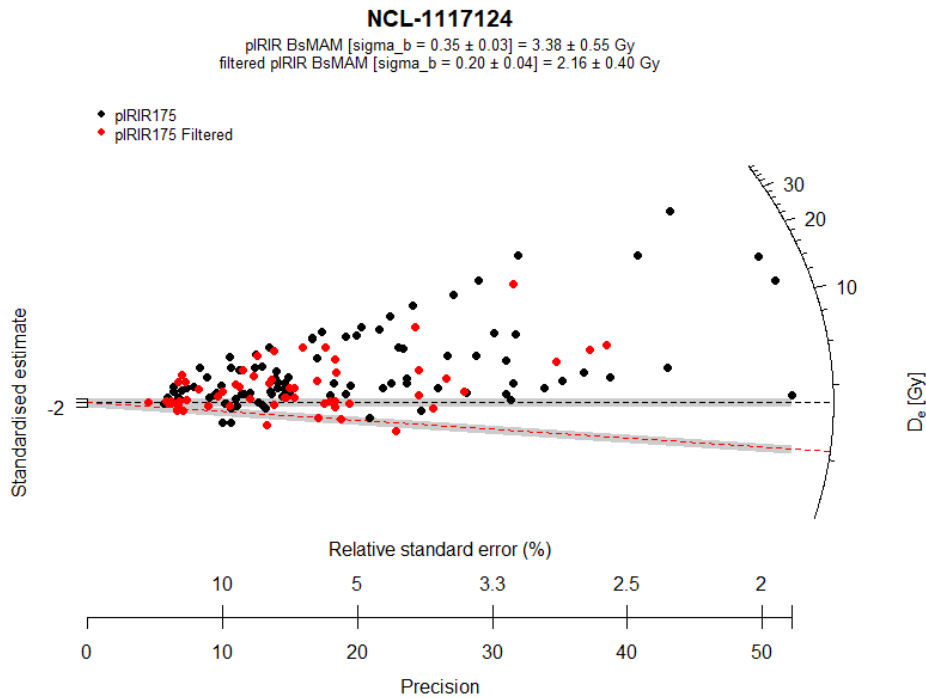

Figures S3. Radial plot of equivalent dose obtained from single-grain feldspar pIRIR measurement of NCL-1117124. The black dotted line indicates the BsMAM result of the total dataset, and the red dotted line indicates the BsMAM result of the filtered dataset. The  $\sigma_b$  values applied for each BsMAM are indicated in the figure.

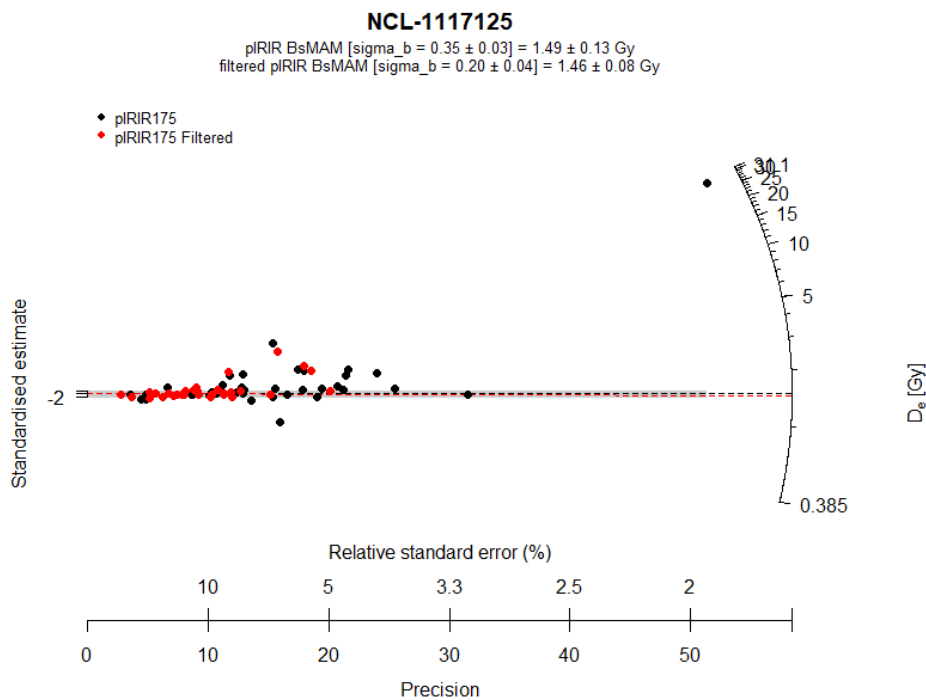

Figure S4. Radial plot of equivalent dose obtained from single-grain feldspar pIRIR measurement of NCL-1117125. The black dotted line indicates the BsMAM result of the total dataset, and the red dotted line indicates the BsMAM result of the filtered dataset. The  $\sigma_b$  values applied for each BsMAM are indicated in the figure.

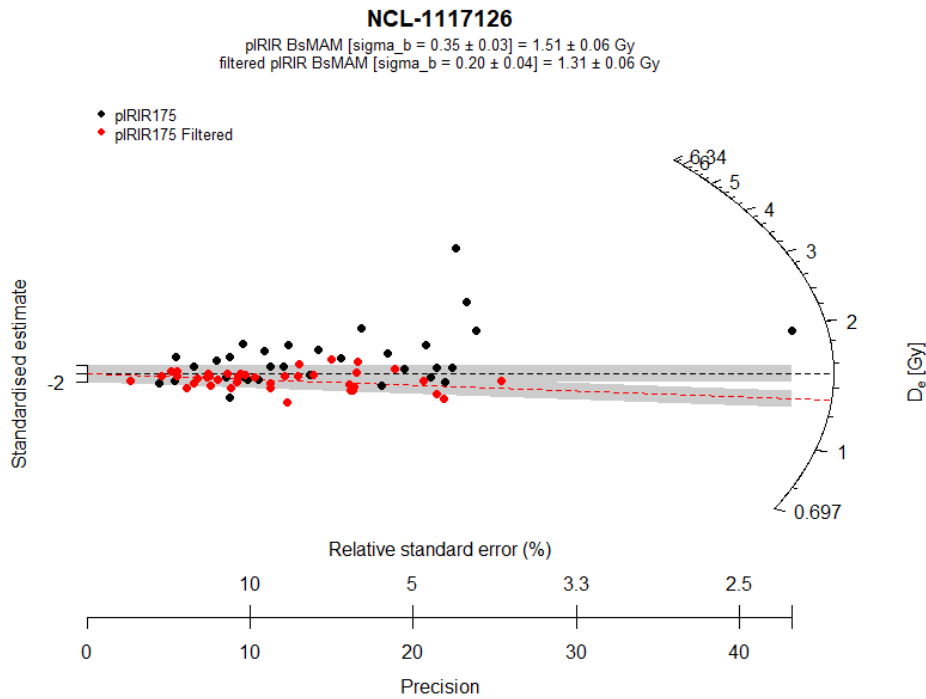

Figure S5. Radial plot of equivalent dose obtained from single-grain feldspar pIRIR measurement of NCL-1117126. The black dotted line indicates the BsMAM result of the total dataset, and the red dotted line indicates the BsMAM result of the filtered dataset. The  $\sigma_b$  values applied for each BsMAM are indicated in the figure.

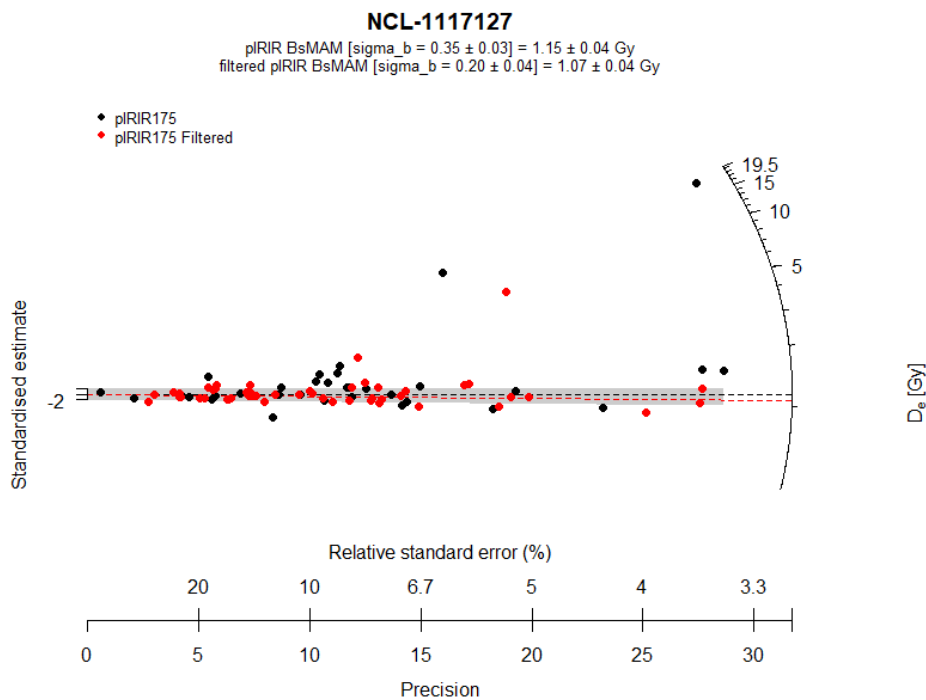

Figure S6. Radial plot of equivalent dose obtained from single-grain feldspar pIRIR measurement of NCL-1117127. The black dotted line indicates the BsMAM result of the total dataset, and the red dotted line indicates the BsMAM result of the filtered dataset. The  $\sigma_b$  values applied for each BsMAM are indicated in the figure.

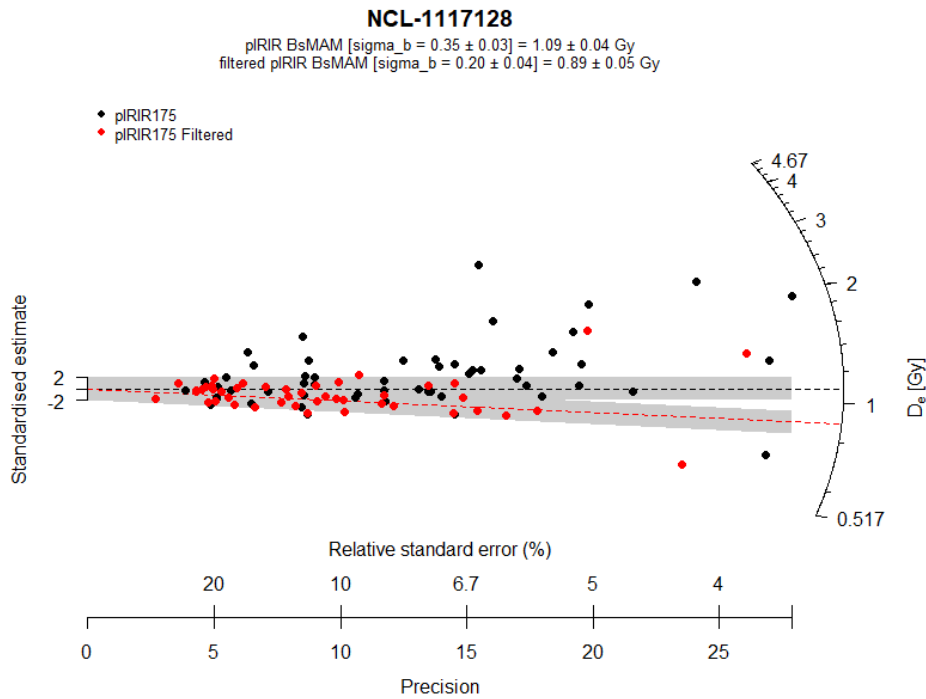

Figure S7. Radial plot of equivalent dose obtained from single-grain feldspar pIRIR measurement of NCL-1117128. The black dotted line indicates the BsMAM result of the total dataset, and the red dotted line indicates the BsMAM result of the filtered dataset. The  $\sigma_b$  values applied for each BsMAM are indicated in the figure.

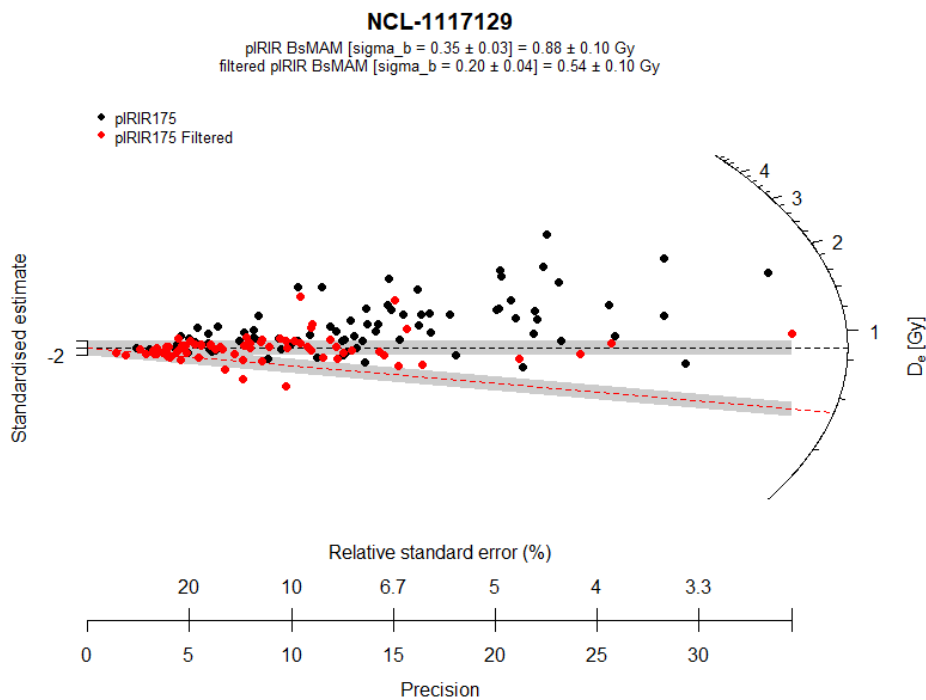

Figure S8. Radial plot of equivalent dose obtained from single-grain feldspar pIRIR measurement of NCL-1117129. The black dotted line indicates the BsMAM result of the total dataset, and the red dotted line indicates the BsMAM result of the filtered dataset. The  $\sigma_b$  values applied for each BsMAM are indicated in the figure.



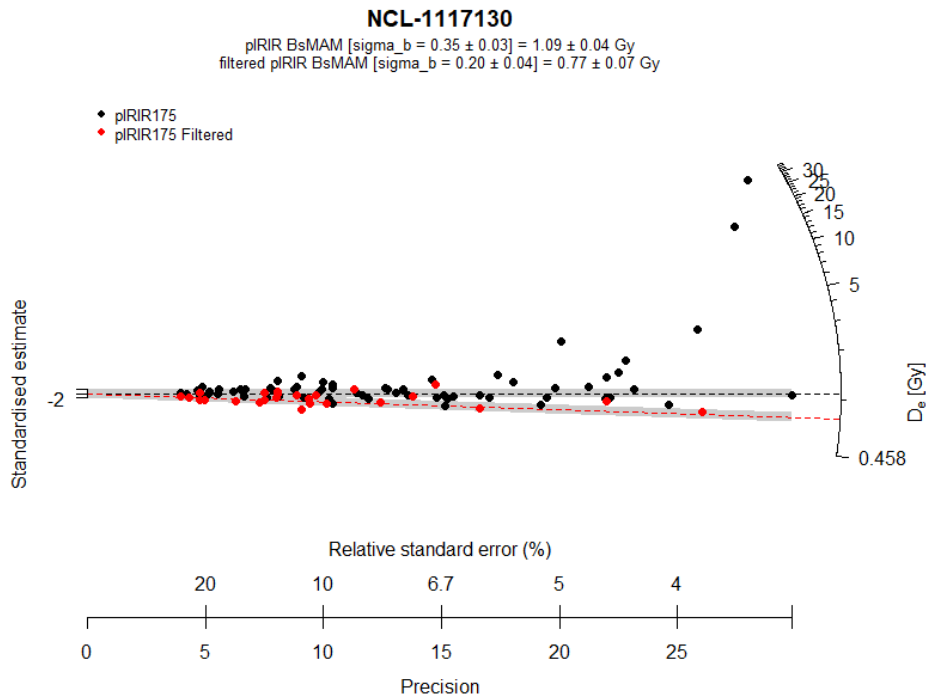

**Figure S9.** Radial plot of equivalent dose obtained from single-grain feldspar pIRIR measurement of NCL-1117130. The black dotted line indicates the BsMAM result of the total dataset, and the red dotted line indicates the BsMAM result of the filtered dataset. The  $\sigma_b$  values applied for each BsMAM are indicated in the figure.

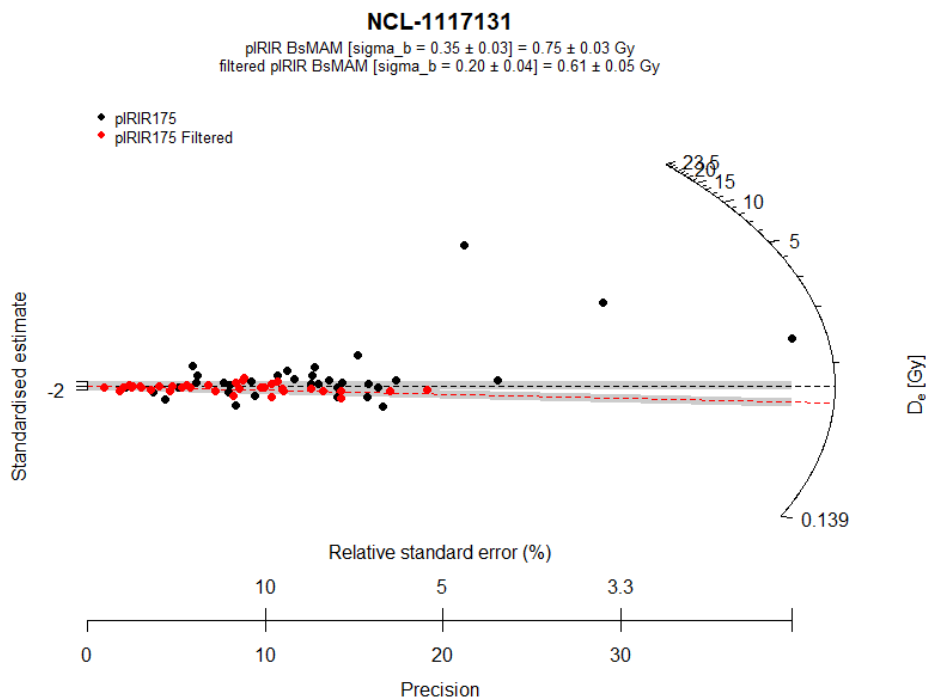

**Figure S10.** Radial plot of equivalent dose obtained from single-grain feldspar pIRIR measurement of NCL-1117131. The black dotted line indicates the BsMAM result of the total dataset, and the red dotted line indicates the BsMAM result of the filtered dataset. The  $\sigma_b$  values applied for each BsMAM are indicated in the figure.

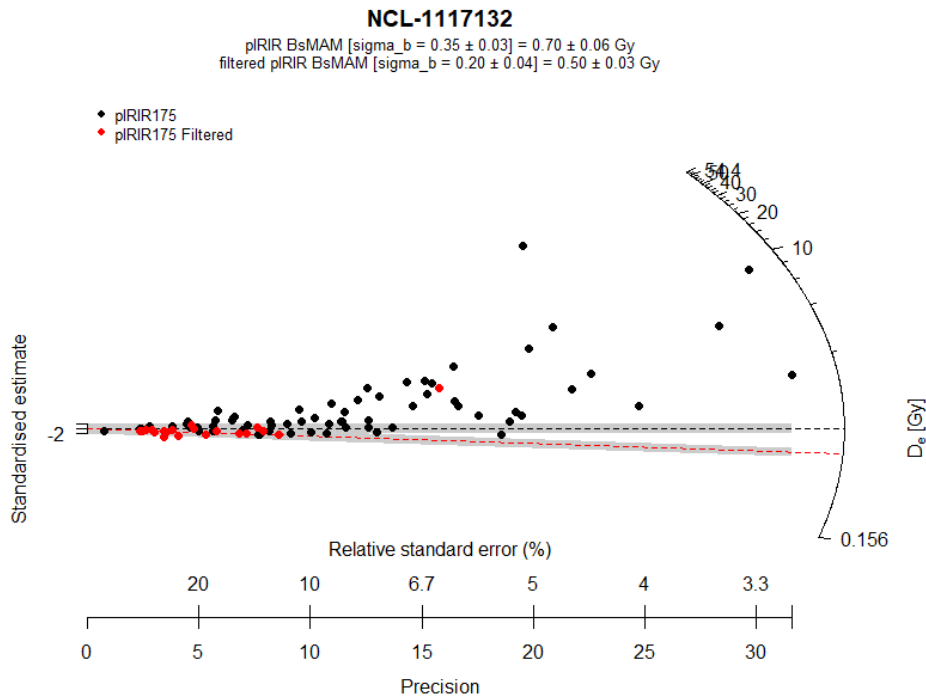

Figure S11. Radial plot of equivalent dose obtained from single-grain feldspar pIRIR measurement of NCL-1117132. The black dotted line indicates the BsMAM result of the total dataset, and the red dotted line indicates the BsMAM result of the filtered dataset. The  $\sigma_b$  values applied for each BsMAM are indicated in the figure.

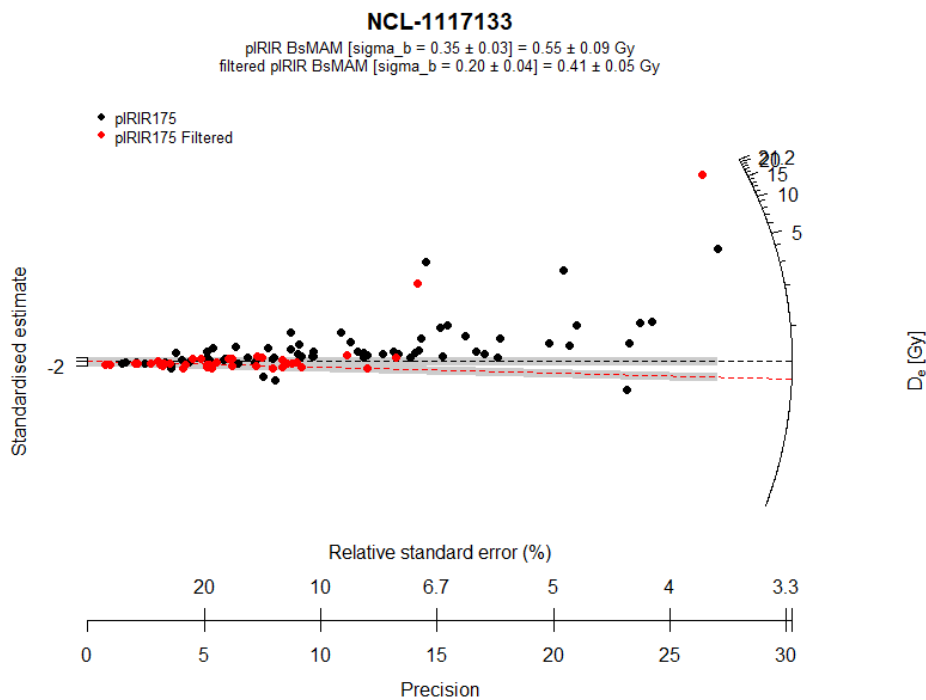

Figure S12. Radial plot of equivalent dose obtained from single-grain feldspar pIRIR measurement of NCL-1117133. The black dotted line indicates the BsMAM result of the total dataset, and the red dotted line indicates the BsMAM result of the filtered dataset. The  $\sigma_b$  values applied for each BsMAM are indicated in the figure.

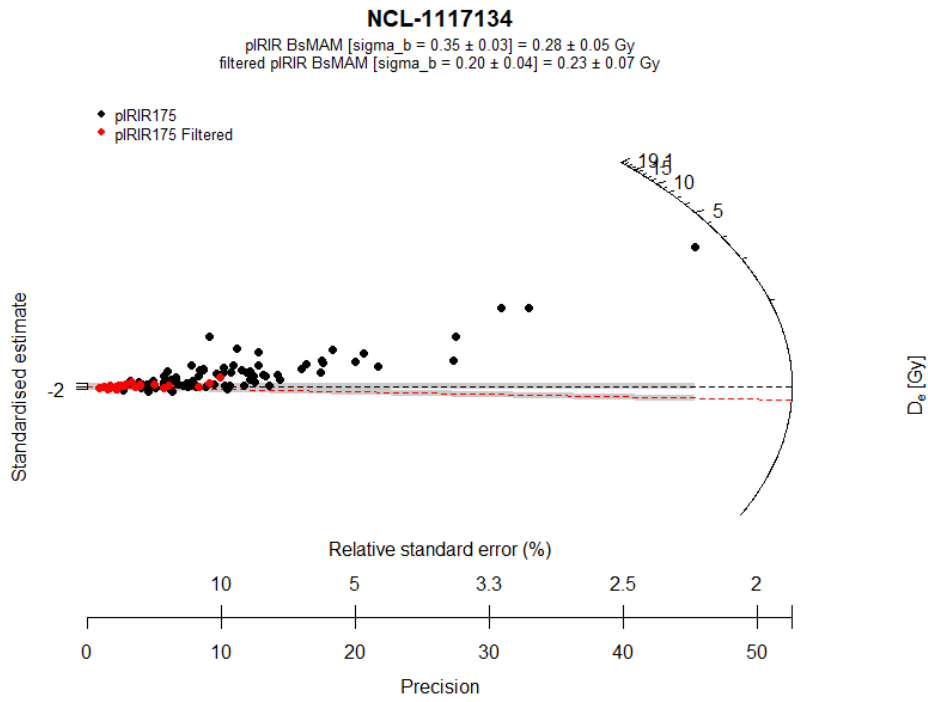

**Figure S13. Radial plot of equivalent dose obtained from single-grain feldspar pIRIR measurement of NCL-1117134. The black dotted line indicates the BsMAM result of the total dataset, and the red dotted line indicates the BsMAM result of the filtered dataset. The  $\sigma_b$  values applied for each BsMAM are indicated in the figure.**

**Section S4. Age model results obtained from IRSL<sub>50</sub> signals**

**Table S4. Results of age models applied to D<sub>e</sub> obtained from IRSL<sub>50</sub> signals. Note that the ages are rounded to decades. The  $\sigma_b$  applied to the BsMAM are equivalent to their pIRIR<sub>175</sub> counterparts.**

| Sample      | Depth (cm) | Dose rate (Gy/ka) | CAM (Gy)     | OD (%) | CAM (a)                        | BsMAM (Gy)<br>$\sigma_b = 0.35 \pm 0.03$ | BsMAM (a)<br>$\sigma_b = 0.35 \pm 0.03$ | CAM Filtered (Gy) | OD Filtered (%) | CAM Filtered (a)               | BsMAM Filtered (Gy)<br>$\sigma_b = 0.20 \pm 0.04$ | BsMAM Filtered (a)<br>$\sigma_b = 0.20 \pm 0.04$ |
|-------------|------------|-------------------|--------------|--------|--------------------------------|------------------------------------------|-----------------------------------------|-------------------|-----------------|--------------------------------|---------------------------------------------------|--------------------------------------------------|
| NCL-1117134 | 22         | 2.10 ± 0.10       | 0.20 ± 0.08  | 72 ± 6 | 90 ± 40<br>(1920 ± 40 CE)      | 0.14 ± 0.01                              | 70 ± 10<br>(1950 ± 10 CE)               | 0.20 ± 0.14       | 51 ± 12         | 90 ± 70<br>(1920 ± 70 CE)      | 0.12 ± 0.04                                       | 60 ± 20<br>(1960 ± 20 CE)                        |
| NCL-1117133 | 31         | 1.99 ± 0.10       | 0.41 ± 0.06  | 73 ± 5 | 210 ± 30<br>(1810 ± 30 CE)     | 0.38 ± 0.01                              | 190 ± 10<br>(1830 ± 10 CE)              | 0.39 ± 0.14       | 71 ± 10         | 200 ± 70<br>(1820 ± 70 CE)     | 0.32 ± 0.04                                       | 160 ± 20<br>(1860 ± 20 CE)                       |
| NCL-1117132 | 41         | 2.03 ± 0.10       | 0.47 ± 0.07  | 63 ± 5 | 230 ± 30<br>(1790 ± 30 CE)     | 0.42 ± 0.02                              | 210 ± 20<br>(1810 ± 20 CE)              | 0.42 ± 0.11       | 47 ± 8          | 210 ± 60<br>(1810 ± 60 CE)     | 0.38 ± 0.02                                       | 190 ± 20<br>(1830 ± 20 CE)                       |
| NCL-1117131 | 50         | 2.07 ± 0.10       | 0.54 ± 0.05  | 48 ± 3 | 260 ± 30<br>(1760 ± 30 CE)     | 0.52 ± 0.02                              | 250 ± 20<br>(1770 ± 20 CE)              | 0.49 ± 0.05       | 22 ± 4          | 240 ± 30<br>(1780 ± 30 CE)     | 0.46 ± 0.03                                       | 220 ± 20<br>(1800 ± 20 CE)                       |
| NCL-1117130 | 60         | 2.09 ± 0.10       | 0.65 ± 0.05  | 50 ± 4 | 310 ± 30<br>(1700 ± 30 CE)     | 0.62 ± 0.03                              | 300 ± 20<br>(1720 ± 20 CE)              | 0.76 ± 0.07       | 28 ± 5          | 360 ± 40<br>(1660 ± 40 CE)     | 0.63 ± 0.09                                       | 300 ± 50<br>(1710 ± 50 CE)                       |
| NCL-1117129 | 70         | 2.11 ± 0.10       | 0.71 ± 0.03  | 38 ± 2 | 340 ± 20<br>(1680 ± 20 CE)     | 0.68 ± 0.02                              | 320 ± 20<br>(1700 ± 20 CE)              | 0.72 ± 0.04       | 31 ± 3          | 340 ± 30<br>(1680 ± 30 CE)     | 0.64 ± 0.05                                       | 300 ± 30<br>(1710 ± 30 CE)                       |
| NCL-1117128 | 81         | 2.11 ± 0.10       | 0.76 ± 0.03  | 35 ± 2 | 360 ± 20<br>(1660 ± 20 CE)     | 0.74 ± 0.03                              | 350 ± 20<br>(1670 ± 20 CE)              | 0.83 ± 0.04       | 24 ± 3          | 400 ± 30<br>(1620 ± 30 CE)     | 0.78 ± 0.04                                       | 370 ± 30<br>(1650 ± 30 CE)                       |
| NCL-1117127 | 96         | 2.12 ± 0.10       | 1.01 ± 0.05  | 56 ± 4 | 480 ± 30<br>(1540 ± 30 CE)     | 0.91 ± 0.03                              | 430 ± 20<br>(1590 ± 20 CE)              | 1.08 ± 0.07       | 43 ± 5          | 510 ± 40<br>(1510 ± 40 CE)     | 0.96 ± 0.04                                       | 460 ± 30<br>(1560 ± 30 CE)                       |
| NCL-1117126 | 101        | 2.00 ± 0.10       | 1.10 ± 0.04  | 46 ± 3 | 550 ± 40<br>(1470 ± 40 CE)     | 1.05 ± 0.04                              | 530 ± 30<br>(1490 ± 30 CE)              | 1.15 ± 0.04       | 17 ± 3          | 570 ± 40<br>(1440 ± 40 CE)     | 1.12 ± 0.07                                       | 560 ± 40<br>(1460 ± 40 CE)                       |
| NCL-1117125 | 112        | 1.97 ± 0.10       | 1.60 ± 0.06  | 60 ± 5 | 810 ± 50<br>(1200 ± 50 CE)     | 1.33 ± 0.07                              | 680 ± 50<br>(1340 ± 50 CE)              | 1.67 ± 0.10       | 55 ± 7          | 850 ± 70<br>(1170 ± 70 CE)     | 1.31 ± 0.12                                       | 670 ± 70<br>(1350 ± 70 CE)                       |
| NCL-1117124 | 123        | 2.02 ± 0.10       | 4.86 ± 0.06  | 75 ± 4 | 2410 ± 120<br>(390 ± 120 BCE)  | 2.74 ± 0.26                              | 1360 ± 150<br>(660 ± 150 CE)            | 5.52 ± 0.11       | 71 ± 8          | 2740 ± 150<br>(720 ± 150 BCE)  | 2.77 ± 0.33                                       | 1380 ± 180<br>(640 ± 180 CE)                     |
| NCL-1117123 | 142        | 2.09 ± 0.10       | 12.21 ± 0.04 | 52 ± 3 | 5840 ± 290<br>(3830 ± 290 BCE) | 7.96 ± 1.04                              | 3810 ± 530<br>(1790 ± 530 BCE)          | 12.46 ± 0.08      | 50 ± 6          | 5960 ± 290<br>(3940 ± 290 BCE) | 6.29 ± 0.94                                       | 3010 ± 470<br>(990 ± 470 BCE)                    |
| NCL-1117122 | 165        | 2.15 ± 0.10       | 15.37 ± 0.03 | 33 ± 2 | 7140 ± 340<br>(5120 ± 340 BCE) | 15.05 ± 0.74                             | 6990 ± 490<br>(4970 ± 490 BCE)          | 16.82 ± 0.05      | 29 ± 3          | 7810 ± 370<br>(5790 ± 370 BCE) | 14.57 ± 3.11                                      | 6760 ± 1480<br>(4750 ± 1480 BCE)                 |

Section S5. Radial plots of single-aliquot quartz OSL measurements

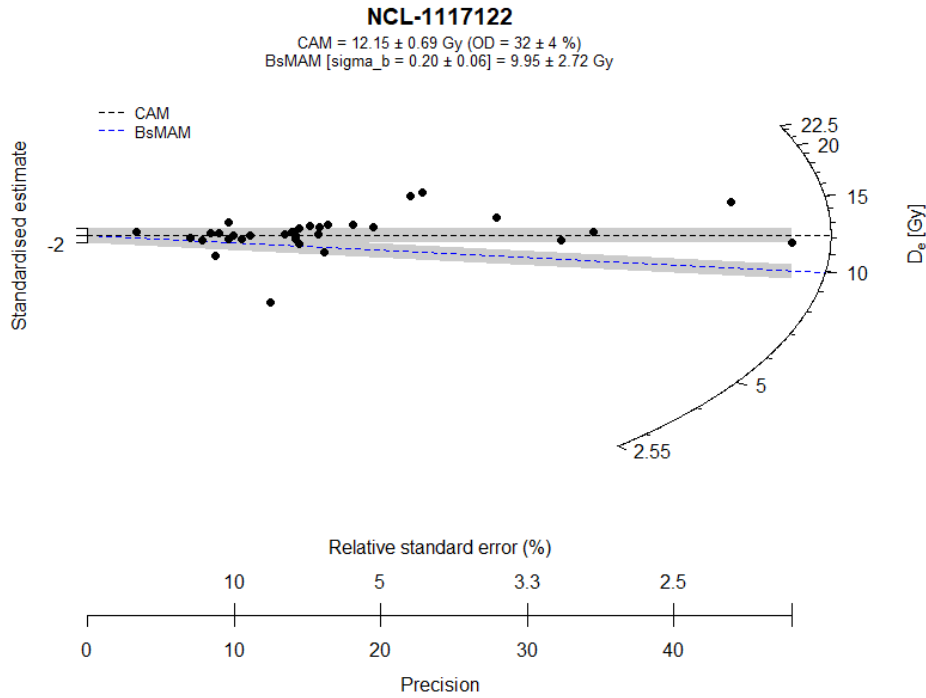

Figure S14. Radial plot of equivalent dose obtained from single-aliquot quartz OSL measurement of NCL-1117122. The black dotted line indicates the CAM result, and the blue dotted line indicates the BsMAM result.

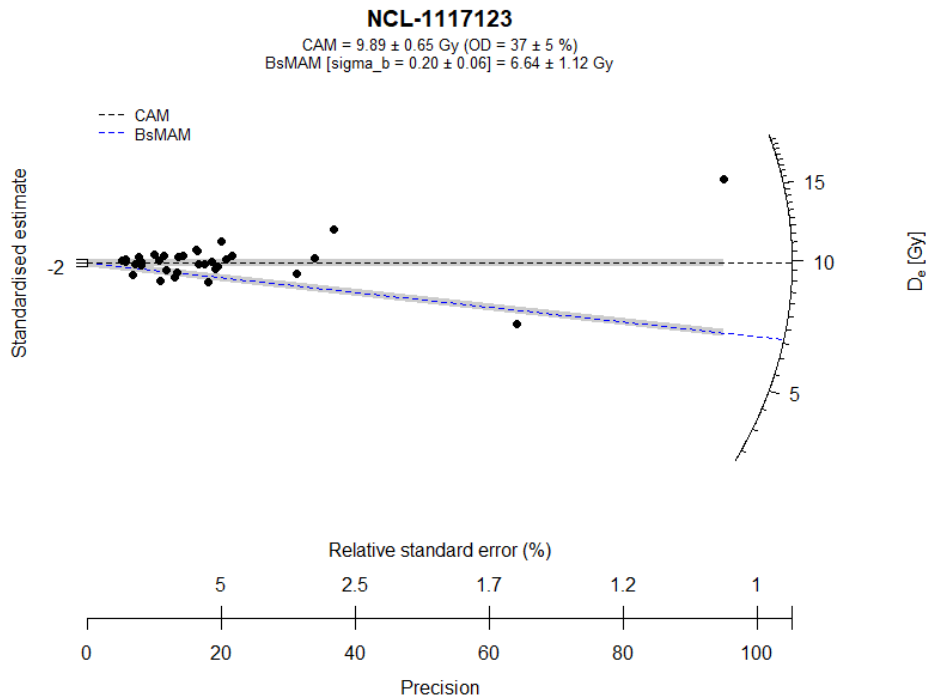

Figure S15. Radial plot of equivalent dose obtained from single-aliquot quartz OSL measurement of NCL-1117123. The black dotted line indicates the CAM result, and the blue dotted line indicates the BsMAM result.

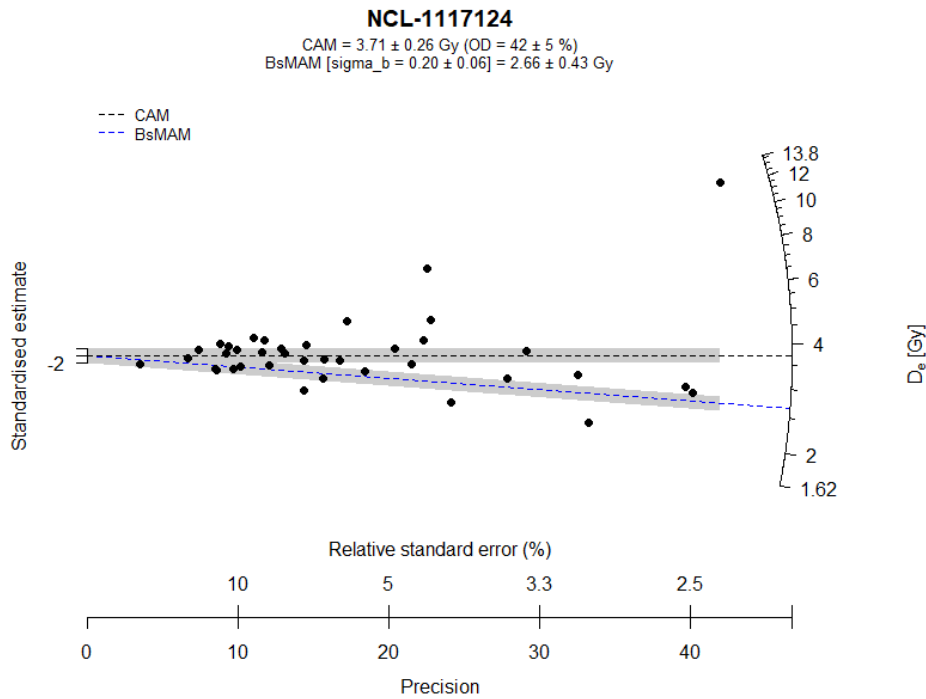

Figure S16. Radial plot of equivalent dose obtained from single-aliquot quartz OSL measurement of NCL-1117124. The black dotted line indicates the CAM result, and the blue dotted line indicates the BsMAM result.

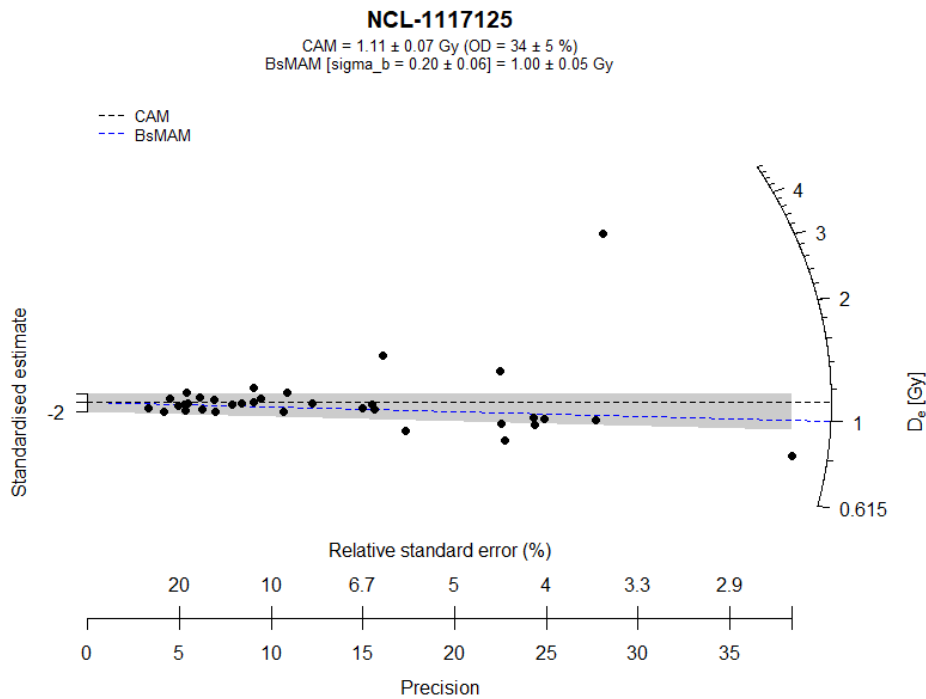

Figure S17. Radial plot of equivalent dose obtained from single-aliquot quartz OSL measurement of NCL-1117125. The black dotted line indicates the CAM result, and the blue dotted line indicates the BsMAM result.

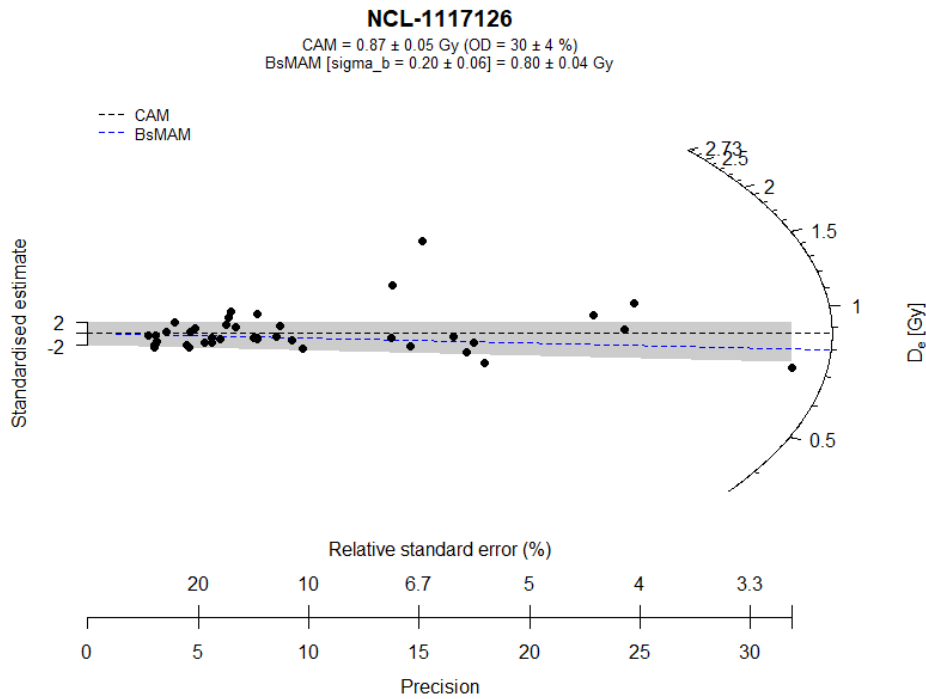

Figure S18. Radial plot of equivalent dose obtained from single-aliquot quartz OSL measurement of NCL-1117126. The black dotted line indicates the CAM result, and the blue dotted line indicates the BsMAM result.

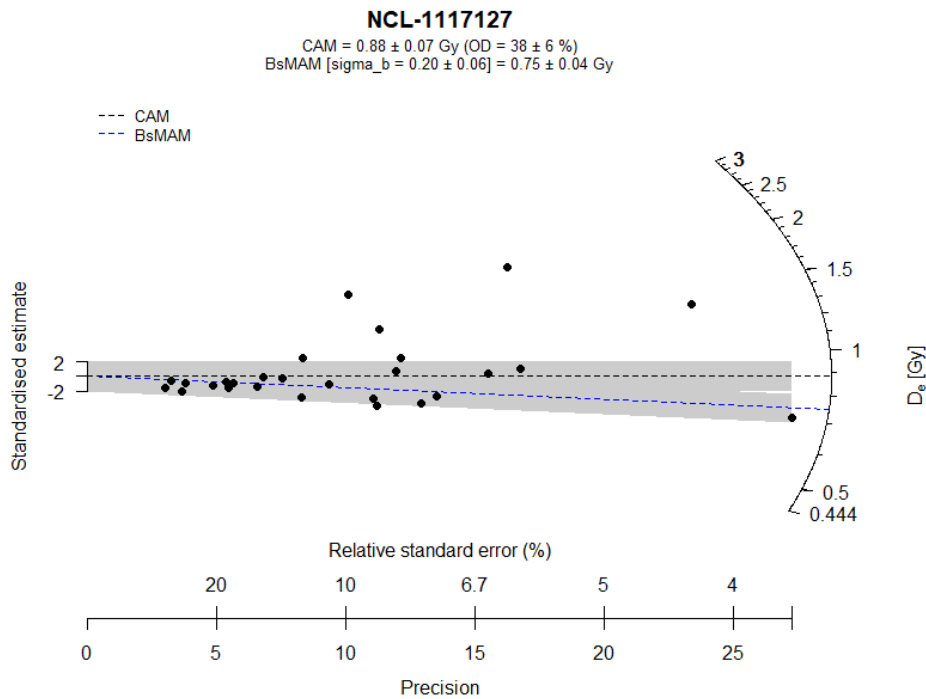

Figure S19. Radial plot of equivalent dose obtained from single-aliquot quartz OSL measurement of NCL-1117127. The black dotted line indicates the CAM result, and the blue dotted line indicates the BsMAM result.

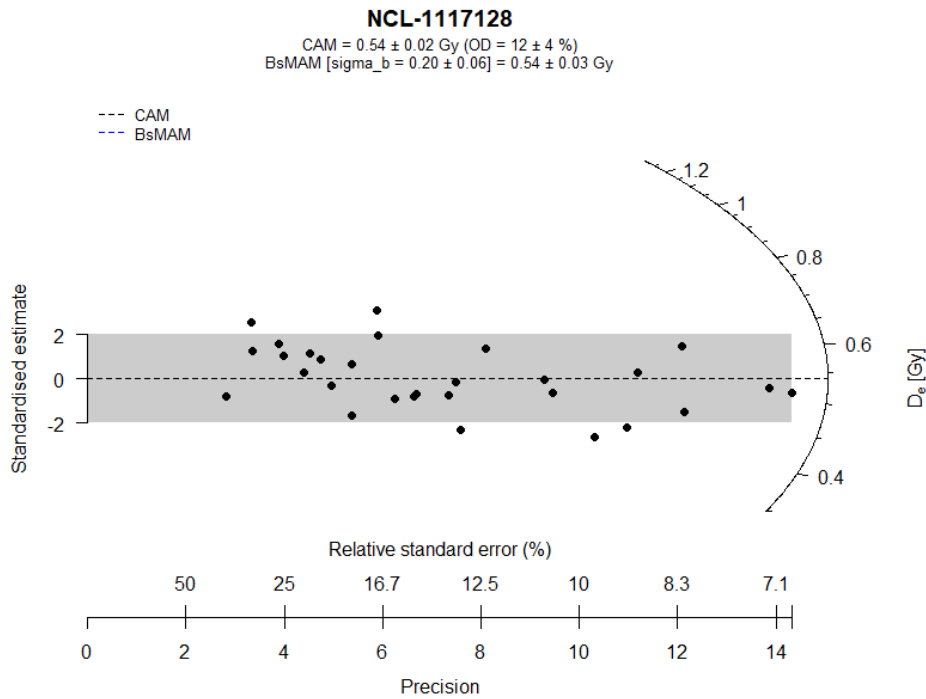

Figure S20. Radial plot of equivalent dose obtained from single-aliquot quartz OSL measurement of NCL-1117127. The black dotted line indicates the CAM result, and the blue dotted line indicates the BsMAM result.

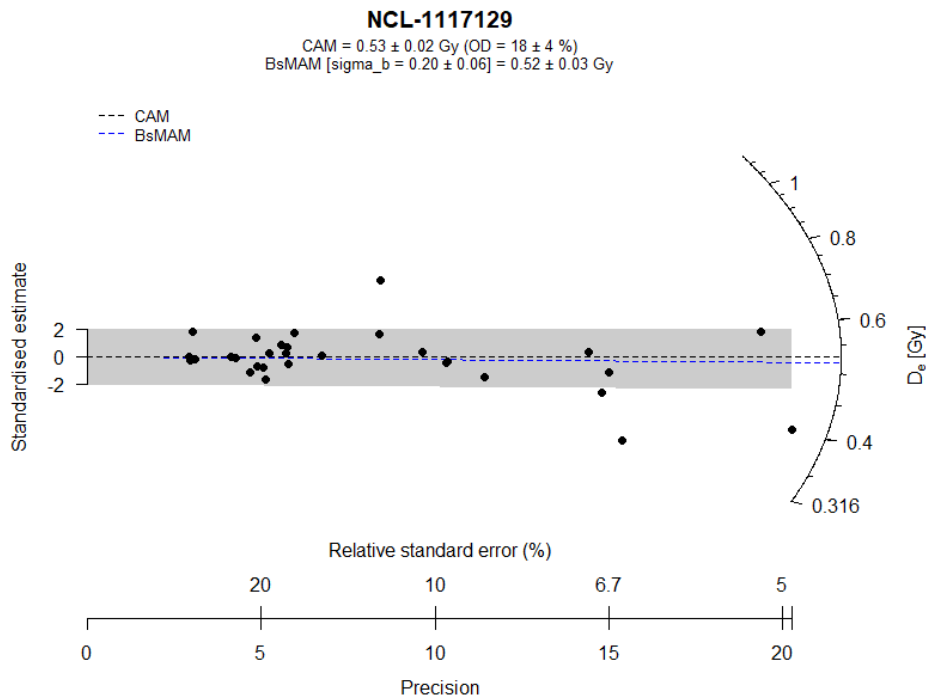

Figure S21. Radial plot of equivalent dose obtained from single-aliquot quartz OSL measurement of NCL-1117129. The black dotted line indicates the CAM result, and the blue dotted line indicates the BsMAM result.



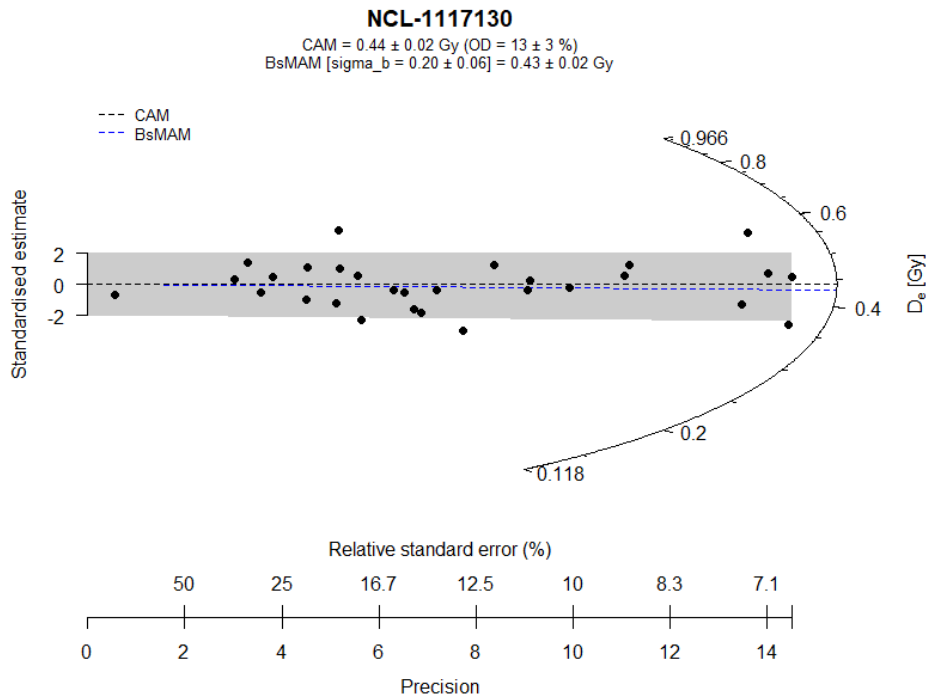

Figure S22. Radial plot of equivalent dose obtained from single-aliquot quartz OSL measurement of NCL-1117130. The black dotted line indicates the CAM result, and the blue dotted line indicates the BsMAM result.

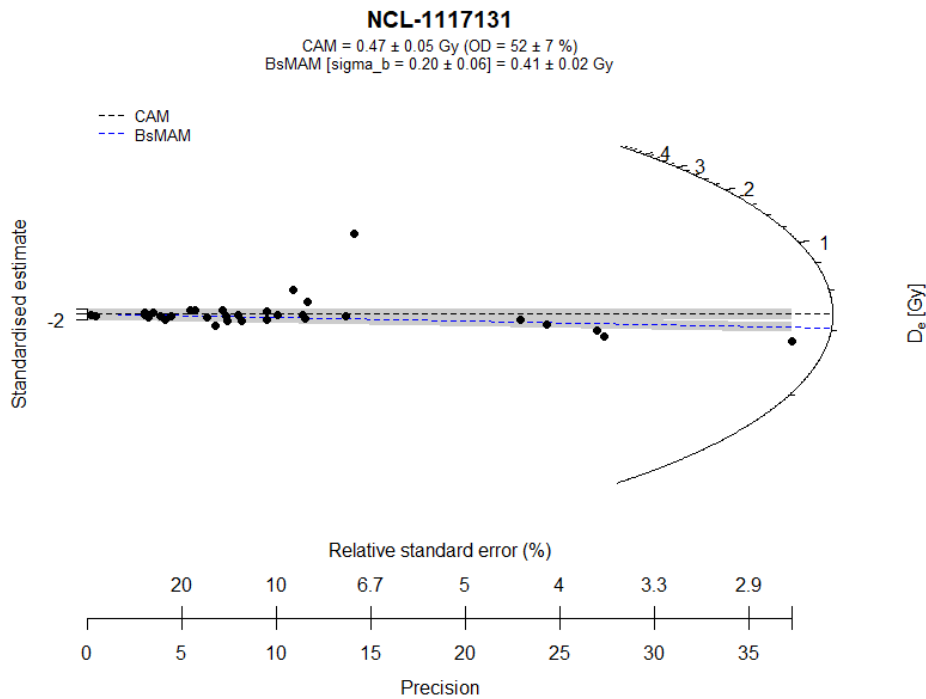

Figure S23. Radial plot of equivalent dose obtained from single-aliquot quartz OSL measurement of NCL-1117131. The black dotted line indicates the CAM result, and the blue dotted line indicates the BsMAM result.

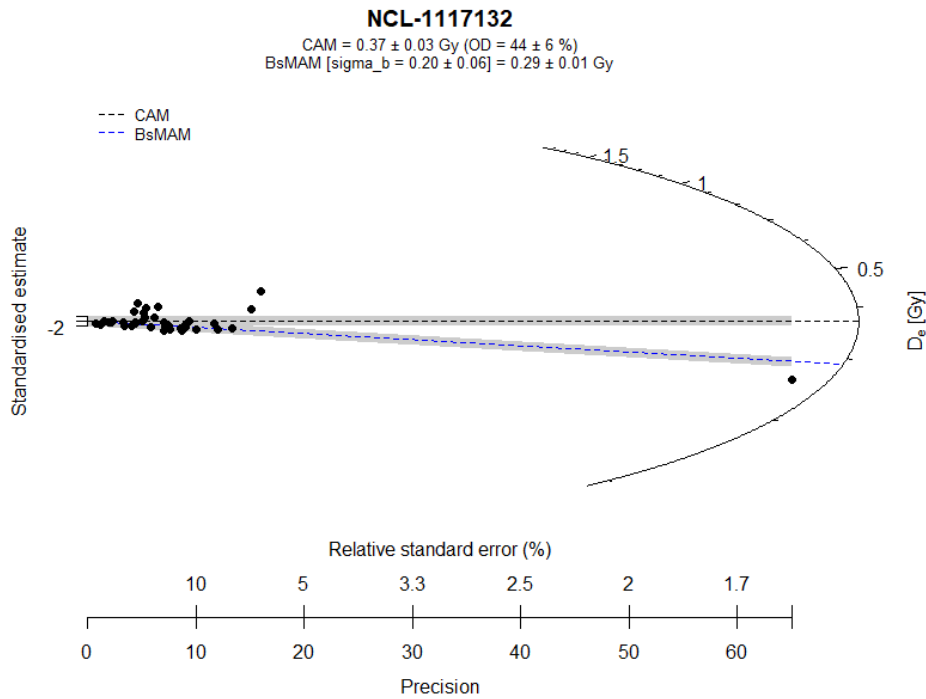

Figure S24. Radial plot of equivalent dose obtained from single-aliquot quartz OSL measurement of NCL-1117132. The black dotted line indicates the CAM result, and the blue dotted line indicates the BsMAM result.

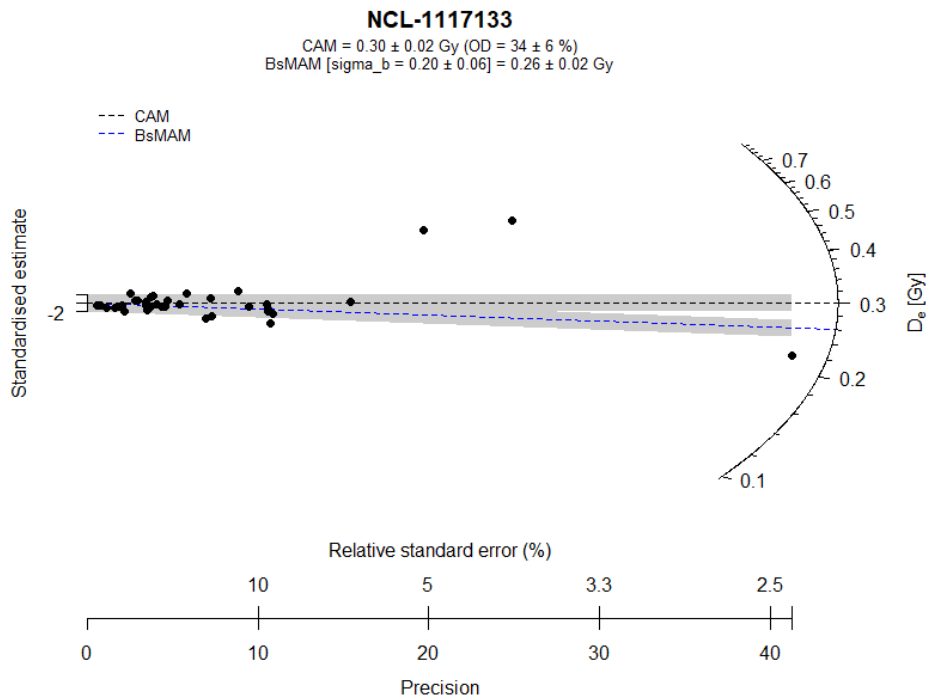

Figure S25. Radial plot of equivalent dose obtained from single-aliquot quartz OSL measurement of NCL-1117133. The black dotted line indicates the CAM result, and the blue dotted line indicates the BsMAM result.

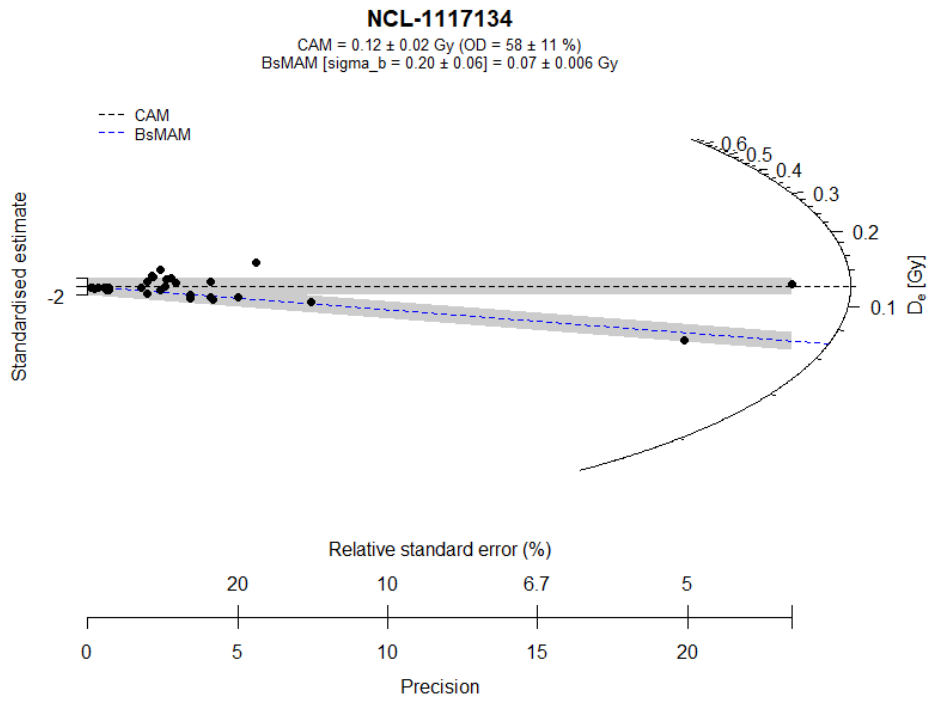

Figure S26. Radial plot of equivalent dose obtained from single-aliquot quartz OSL measurement of NCL-1117134. The black dotted line indicates the CAM result, and the blue dotted line indicates the BsMAM result.
